# Supplementary material for: A Versatile Biosynthetic Hydrogel Platform for Engineering of Tissue Analogues
Source: PubMed Central journal article supplement — Adv Healthc Mater. Author manuscript; Available in PMC 2020 Oct 16. (PMC7116179; doi:10.1002/adhm.201900979), 2019-08-12
Supplement: EMS96593-supplement-Supplementary_information.pdf [file EMS96593-supplement-Supplementary_information.pdf]

# ADVANCED HEALTHCARE MATERIALS

## Supporting Information

for *Adv. Healthcare Mater.*, DOI: 10.1002/adhm.201900979

### A Versatile Biosynthetic Hydrogel Platform for Engineering of Tissue Analogues

*Barbara J. Klotz, Loes A. Oosterhoff, Lizette Utomo, Khoon S. Lim, Queralt Vallmajo-Martin, Hans Clevers, Tim B. F. Woodfield, Antoine J. W. P. Rosenberg, Jos Malda, Martin Ehrbar, Bart Spee, and Debby Gawlitta\**

## Supporting Information

### Supplementary comment 1.

We hypothesized, that while the amino acid sequence containing a glutamine is a very specific sequence that the lysine (Lys) containing sequence is more generic. Indeed, hydrogels did not form in the absence of PEG-Gln when PEG-Lys was combined with gelatin. To exclude the formation of intramolecular crosslinks, pure gelatin was crosslinked at a concentration of 10% w/v with FXIIIa. Under present crosslinking conditions, pure gelatin did not form a hydrogel and the polymer solution remained at a low viscosity (data not shown), demonstrating the need for the substrate-specific Gln-sequence for FXIIIa mediated crosslinking.

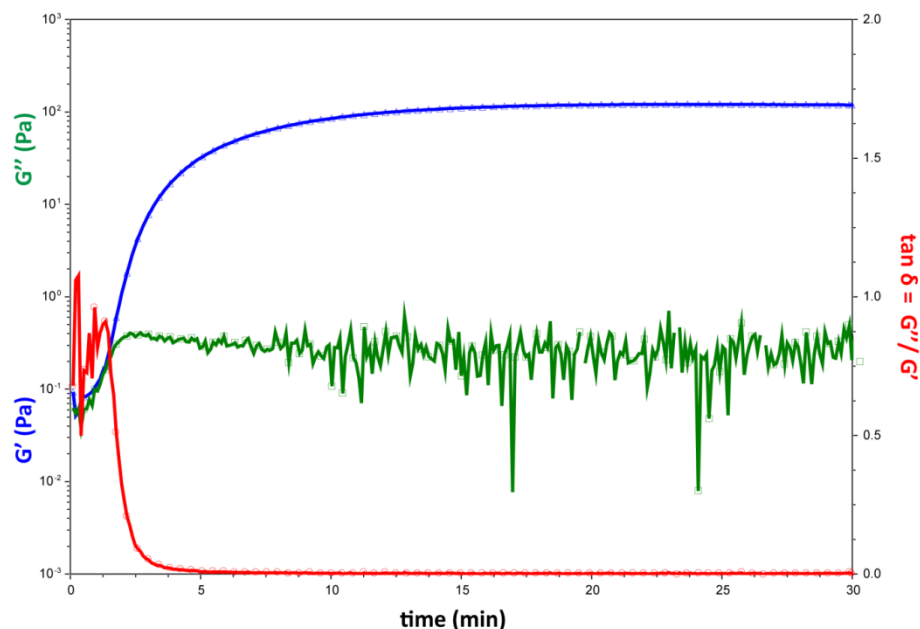

**Supplementary Figure 1.** Hydrogel formation of gelatin and PEG mediated by FXIIIa. The point of gelation occurred at about 2 minutes and the crosslinking was completed after about 15 minutes, when  $G'$  reached a plateau. Depicted data are from a representative measurement;  $n= 3$  independent experiments

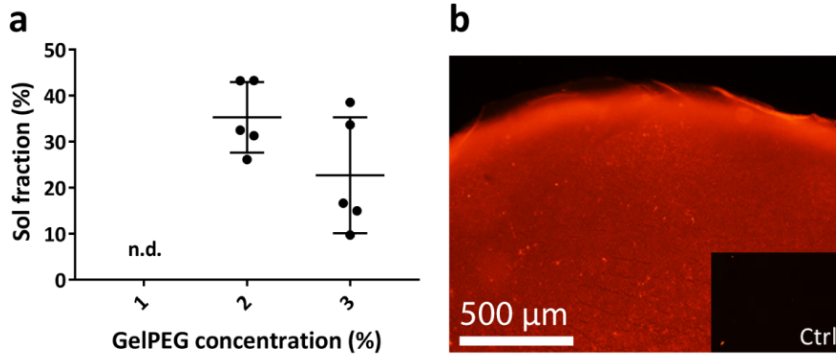

**Supplementary Figure 2.** Hydrogel sol fraction and LN binding in gelPEG hydrogel networks. **a** Sol fraction in dependence of gelPEG concentration. **b** Anti-LN-subunit  $\alpha 5$  staining of LN521-laden 3% w/v gelPEG hydrogel compared to unloaded hydrogel (insert) after 1 d swelling in TBS. Data is depicted as mean + SD,  $n=5$

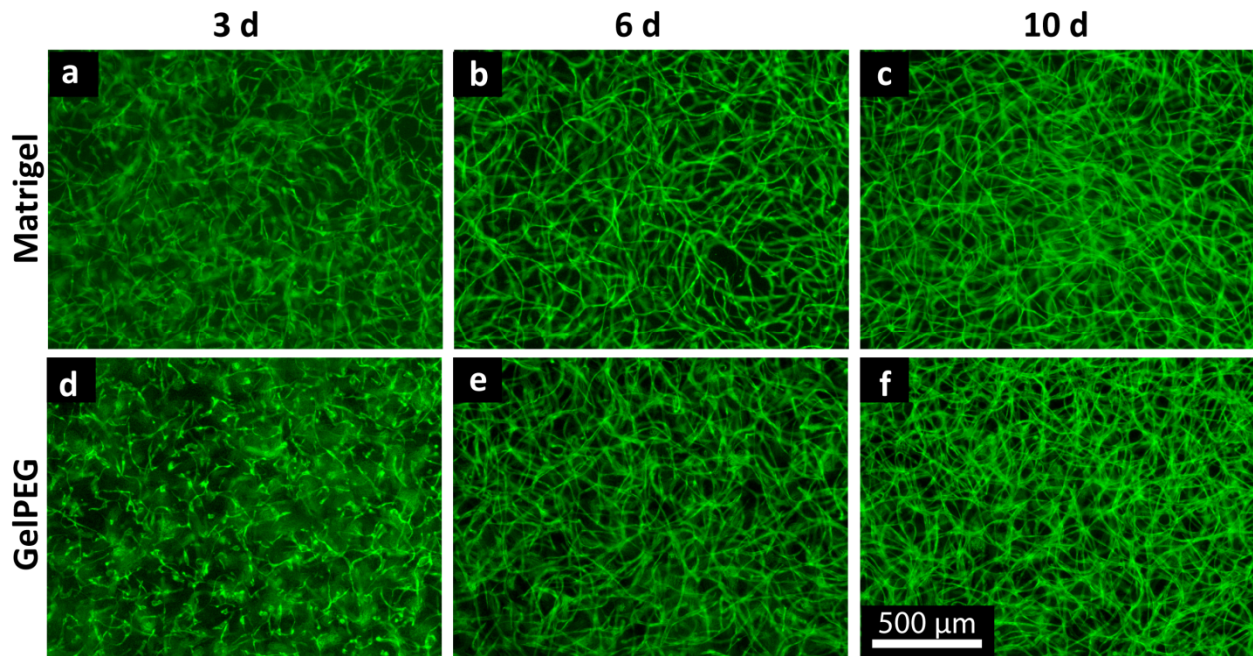

**Supplementary Figure 3.** Pre-vascular network formation in GFP-ECFC and MSC co-cultures under vasculogenic culture conditions. **a-c** GFP-ECFCs in Matrigel form vascular-like networks on day 3 which are remodeled up to day 10. **d-f** GFP-ECFCs in gelPEG hydrogels form vascular-like structures with an initial temporal delay, resulting in comparable networks to Matrigel on day 6 and 10. (widefield fluorescence,  $N=3$ ,  $n=3$ )

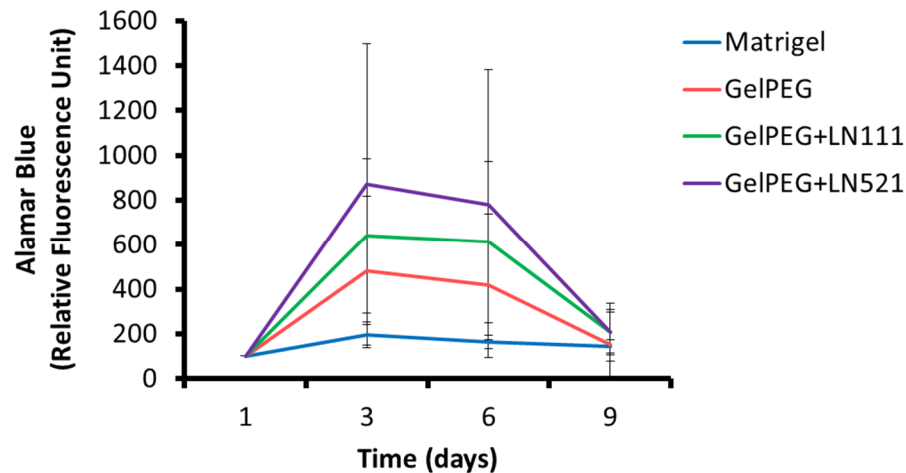

**Supplementary Figure 4.** Metabolic activity of liver organoids over culture time in Matrigel and gelPEG-based hydrogels. Liver organoids exhibited an increase in metabolic activity from day 1 to 3, which gradually decreases over culture time, resulting in comparable activity levels as liver organoids cultured in Matrigel after 9 days culture. Data is depicted as mean  $\pm$  SD;  $N=3$ ,  $n=5$

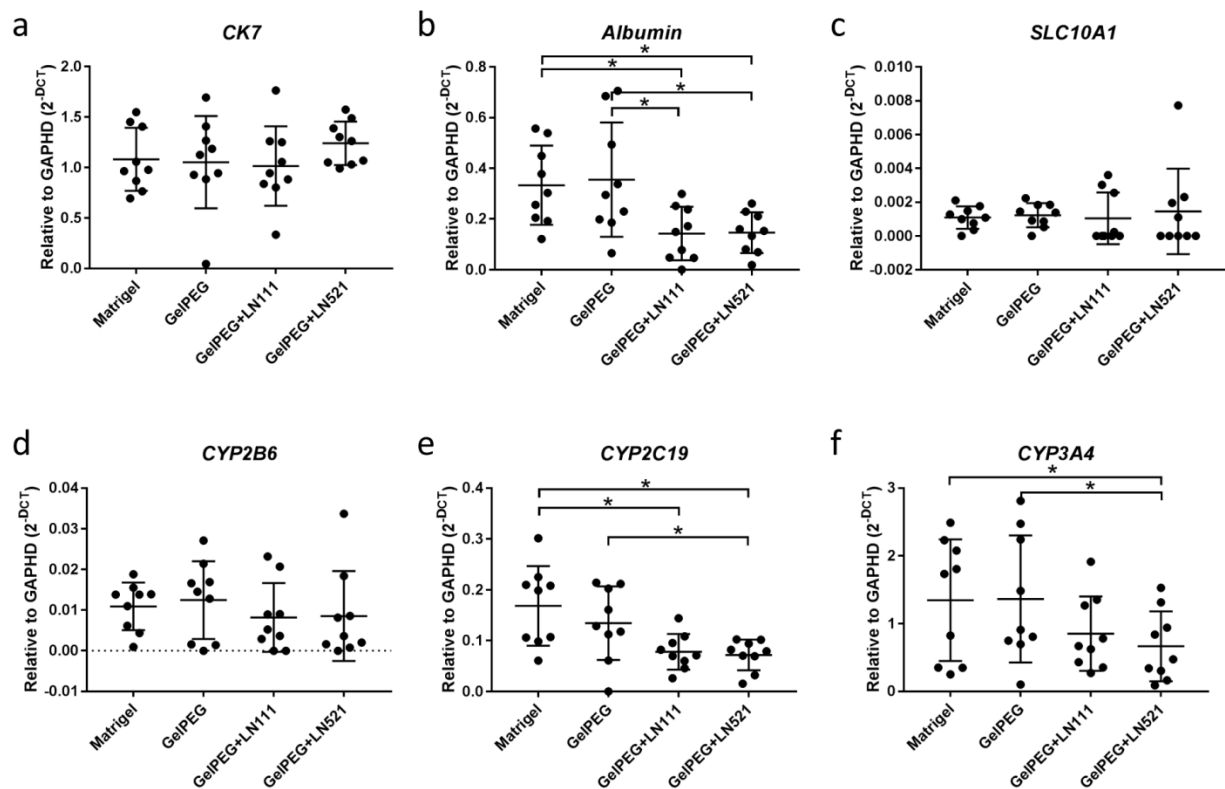

**Supplementary Figure 5.** Gene expression levels of liver organoids that were cultured for 9 days in Matrigel and gelPEG-based hydrogels. **a** The cytokeratin *KRT7* (*CK7*) was equally expressed in all

hydrogels. **b** Albumin expression was decreased in LN-laden gelPEG hydrogels. **c** *SLC10A1*, encoding a liver-specific sodium/bile acid cotransporter, was comparably expressed in all hydrogel compositions. The cytochrome family of enzymes **d** CYP2B6 **e** CYP2C19 and **f** CYP3A4 were comparably expressed in Matrigel and gelPEG, whereas LN-laden hydrogels showed partially lower expression levels. Data is depicted as mean + SD; *N*= 3, *n*= 3

## Tables

**Supplementary table 1:** Primer sets used for qPCR analysis

| Human gene                    | Forward primer           | Reverse primer          |
|-------------------------------|--------------------------|-------------------------|
| <u>Pre-vascularized bone:</u> |                          |                         |
| <i>PECAM1</i>                 | GCAGTGGTTATCATCGGAGTG    | TCGTTGTTGGAGTTCAGAAGTG  |
| <i>CDH5</i>                   | AAGCAGGCCAGGTATGAGAT     | TGTGTACTTGGTCTGGGTGAAG  |
| <i>CSPG4</i>                  | GAAGGAGGACGGACCTCAAG     | GATCAGCTGCTCTTCCACCATT  |
| <i>ACTA2</i>                  | ATGCCATCATGCGTCTGGAT     | ACGCTCAGCAGTAGTAACGA    |
| <i>BGLAP</i>                  | CCTCACACTCCTCGCCCTAT     | GCTTGGACACAAAGGCTGCAC   |
| <i>SPP1</i>                   | GCCGAGGTGATAGTGTGGTT     | GTGGGTTTCAGCACTCTGGT    |
| <i>GAPDH</i>                  | CAACGGATTTGGTCGTATTGGG   | TGCCATGGGTGGAATCATATTGG |
| <u>Liver organoids:</u>       |                          |                         |
| <i>YWHAZ</i>                  | ACTTTTGGTACATTGTGGCTTCAA | CCGCCAGGACAAACCAGTAT    |
| <i>GAPDH</i>                  | TGCACCACCAACTGCTTAGC     | GGCATGGACTGTGGTCATGAG   |
| <i>KRT7</i>                   | GGACATCGAGATCGCCACCT     | ACCGCCACTGCTACTGCCA     |
| <i>CYP2C19</i>                | GGGACAGAGACAACAAGCA      | CCTGGACTTTAGCTGTGACC    |
| <i>ALB</i>                    | GTTCGTTACACCAAGAAAGTACC  | GACCACGGATAGATAGTCTTCTG |
| <i>SLC10A1</i>                | GATATCACTGGTGGTTCTC      | ATCATCCCTCCCTTGATGAC    |
| <i>CYP3A4</i>                 | CACAGGCTGTTGACCATCAT     | TTTTGTCCTATAAGGGCTTT    |
| <i>CYP2B6</i>                 | CTACCAAGATCAAGAGTTCCTG   | ATTTCAAGAAGCCAGAGAAGAG  |
